# Supplementary material for: Device Modeling of Efficient PBDB-T:PZT-Based All-Polymer Solar Cell: Role of Band Alignment
Source: MDPI journal article supplement (doi:10.3390/polym15040869), 2023-02-09
Supplement: s1 [file s1]

# Device Modeling of Efficient PBDB-T:PZT-Based All-Polymer Solar Cell: Role of Band Alignment

Marwa S. Salem <sup>1,2</sup>, Ahmed Shaker <sup>3</sup> and Mostafa Mohamed Salah <sup>4,\*</sup>

<sup>1</sup> Department of Computer Engineering, College of Computer Science and Engineering, University of Ha'il, Ha'il 55211, Saudi Arabia

<sup>2</sup> Department of Electrical Communication and Electronics Systems Engineering, Faculty of Engineering, Modern Science and Arts University, Cairo 12556, Egypt

<sup>3</sup> Faculty of Engineering, Ain Shams University, Cairo 11535, Egypt

<sup>4</sup> Electrical Engineering Department, Future University in Egypt, Cairo 11835, Egypt

\* Correspondence: mostafa.abdulkhalek@fue.edu.eg

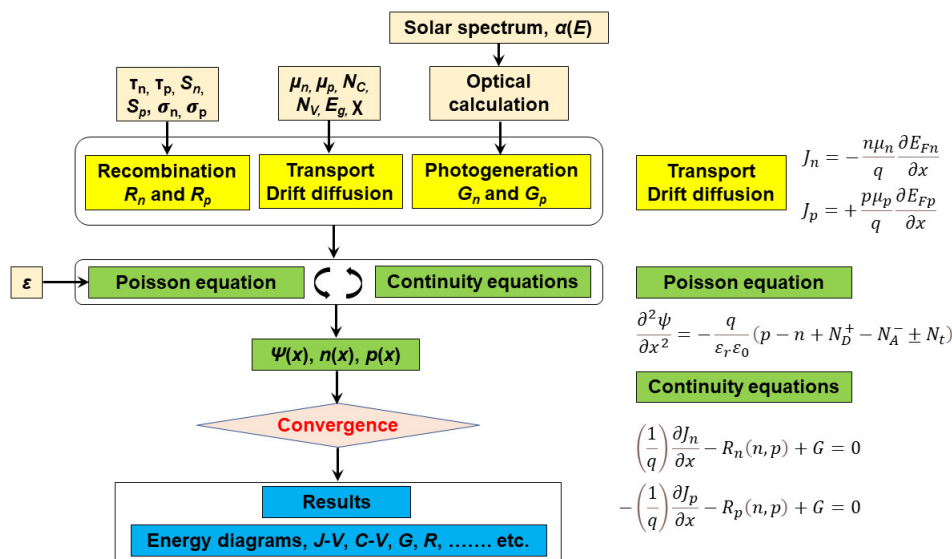

**Figure S1.** SCAPS simulator flowchart showing the basic semiconductor equations and the different required input parameters.

**Table S1.** Definitions of SCAPS input and output parameters.

| Parameter.   | Description                   | Unit                 | Parameter        | Description               | Unit                             |
|--------------|-------------------------------|----------------------|------------------|---------------------------|----------------------------------|
| $t$          | Thickness                     | nm                   | $q$              | electrical charge         | C                                |
| $E_g$        | Energy gap                    | eV                   | $\psi$           | Electrostatic potential   | V                                |
| $\chi$       | Electron affinity             | eV                   | $n$              | Electron concentration    | cm <sup>-3</sup>                 |
| $\epsilon_r$ | Relative permittivity         |                      | $p$              | Hole                      | cm <sup>-3</sup>                 |
| $\mu_n$      | Electron mobility             | cm <sup>2</sup> /V·s | $J_n$            | Electron current density  | mA/cm <sup>2</sup>               |
| $\mu_p$      | Hole mobility                 | cm <sup>2</sup> /V·s | $J_p$            | Hole current density      | mA/cm <sup>2</sup>               |
| $N_c$        | Conduction band effective DOS | cm <sup>-3</sup>     | $N_t$            | Defect density            | cm <sup>-3</sup>                 |
| $N_v$        | Valence band effective DOS    | cm <sup>-3</sup>     | $G$              | Generation rate           | cm <sup>-3</sup> s <sup>-1</sup> |
| $N_D^+$      | Ionized donor density         | cm <sup>-3</sup>     | $R$              | Recombination rate        | cm <sup>-3</sup> s <sup>-1</sup> |
| $N_A^-$      | Ionized acceptor density      | cm <sup>-3</sup>     | $E_{Fn}, E_{Fp}$ | Quasi-Fermi energy levels | eV                               |

**Table S2.** Main PV parameters for various single HTL materials.

| Performance Parameters         | PEDOT | CuI    | NiO    | CuSCN  | Spiro  | P3HT   | PTAA   |
|--------------------------------|-------|--------|--------|--------|--------|--------|--------|
| $V_{oc}$ [V]                   | 0.912 | 1.209  | 1.211  | 1.183  | 1.193  | 1.191  | 1.204  |
| $J_{sc}$ [mA/cm <sup>2</sup> ] | 23.91 | 23.875 | 23.906 | 23.901 | 23.842 | 22.985 | 23.851 |
| FF [%]                         | 68.45 | 72.28  | 67.75  | 62.98  | 69.13  | 73.69  | 70.64  |
| PCE [%]                        | 14.91 | 20.87  | 19.61  | 17.81  | 19.67  | 20.17  | 20.29  |

**Table S3.** Main PV parameters for various double HTL materials (integrated with PEDOT).

| Performance Parameters         | CuI    | NiO    | CuSCN  | Spiro  | P3HT   | PTAA   |
|--------------------------------|--------|--------|--------|--------|--------|--------|
| $V_{oc}$ [V]                   | 1.212  | 1.212  | 1.212  | 1.211  | 1.209  | 1.211  |
| $J_{sc}$ [mA/cm <sup>2</sup> ] | 23.848 | 23.880 | 23.877 | 23.815 | 22.967 | 23.824 |
| FF [%]                         | 78.93  | 78.95  | 78.47  | 77.13  | 78.36  | 78.57  |
| PCE [%]                        | 22.81  | 22.85  | 22.71  | 22.24  | 21.76  | 22.67  |

**Materials' Abbreviations.**

| Abbr.        | Full Name                                                                                                                                                                                                   |
|--------------|-------------------------------------------------------------------------------------------------------------------------------------------------------------------------------------------------------------|
| PBDB-T       | Poly[(2,6-(4,8-bis(5-(2-ethylhexyl)thiophen-2-yl)-benzo[1,2-b:4,5-b']dithiophene))-alt-(5,5-(1',3'-di-2-thienyl-5',7'-bis(2-ethylhexyl)benzo[1',2'-c:4',5'-c']dithiophene-4,8-dione)]                       |
| PZT          | lead zirconate titanate (Pb[Zr(x)Ti(1-x)]O <sub>3</sub> )                                                                                                                                                   |
| ITO          | Indium tin oxide                                                                                                                                                                                            |
| PEDOT:PSS    | poly(3,4-ethylenedioxythiophene) polystyrene sulfonate                                                                                                                                                      |
| PFN-Br       | Poly(9,9-bis(3'-(N,N-dimethyl)-N-ethylammonium-propyl-2,7-fluorene)-alt-2,7-(9,9-di-octylfluorene))dibromide                                                                                                |
| CuI          | Copper Iodide                                                                                                                                                                                               |
| P3HT         | Regioregular poly(3-hexylthiophene)                                                                                                                                                                         |
| PCBM         | fullerene derivative [6,6]-phenyl-C <sub>61</sub> -butyric acid methyl ester                                                                                                                                |
| ZnOS         | Zinc oxysulphide                                                                                                                                                                                            |
| Ag           | Silver                                                                                                                                                                                                      |
| NiO          | Nickel oxide                                                                                                                                                                                                |
| CuSCN        | Cuprous thiocyanate Copper(I) thiocyanate                                                                                                                                                                   |
| Spiro-OMeTAD | [2,2',7,7'-tetrakis(N,N-di-p-methoxyphenyl-amine)9,9'-spirobifluorene]                                                                                                                                      |
| PTAA         | poly(triaryl amine) semiconductor                                                                                                                                                                           |
| PM6          | Poly[(2,6-(4,8-bis(5-(2-ethylhexyl-3-fluoro)thiophen-2-yl)-benzo[1,2-b:4,5-b']dithiophene))-alt-(5,5-(1',3'-di-2-thienyl-5',7'-bis(2-ethylhexyl)benzo[1',2'-c:4',5'-c']dithiophene-4,8-dione)]              |
| Y6           | thienothienopyrrolo-thienothienoindole (TTP-TTI) core base and 2-(5,6-difluoro-3-oxo-2,3-dihydro-1H-inden-1-ylidene)malononitrile (2FIC)                                                                    |
| PN-Se        | Polyphosphazenes-selenium                                                                                                                                                                                   |
| PDINN        | N,N'-Bis[3-[3-(Dimethylamino)propylamino]propyl]perylene-3,4,9,10-tetracarboxylic diimide                                                                                                                   |
| PY           | Pyridine                                                                                                                                                                                                    |
| PTB7         | Poly [[4,8-bis[(2-ethylhexyl)oxy]benzo[1,2-b:4,5-b']dithiophene-2,6-diyl][3-fluoro-2-[(2-ethylhexyl)carbonyl]thieno[3,4-b]thiophenediyl ]]                                                                  |
| ZrAcAc       | zirconium acetylacetonate                                                                                                                                                                                   |
| D18          | Poly[(2,6-(4,8-bis(5-(2-ethylhexyl-3-fluoro)thiophen-2-yl)-benzo[1,2-b:4,5-b']dithiophene))-alt-5,5'-(5,8-bis(4-(2-butyloctyl)thiophen-2-yl)dithieno[3',2':3,4;2'',3'':5,6]benzo[1,2-c][1,2,5]thiadiazole)] |
| N3           | azide Azide ion Hydrazoate Azide anion                                                                                                                                                                      |
